- of risk factors for patient complaints about ambulatory anesthesiology care. *Anesth Analg* 2013; 116:1325–32
30. de Oliveira Filho GR, Dal Mago AJ, Garcia JH, Goldschmidt R: An instrument designed for faculty supervision evaluation by anesthesia residents and its psychometric properties. *Anesth Analg* 2008; 107:1316–22
  31. Hindman BJ, Dexter F, Kreiter CD, Wachtel RE: Determinants, associations, and psychometric properties of resident assessments of anesthesiologist operating room supervision. *Anesth Analg* 2013; 116:1342–51
  32. Dexter F, Ledolter J, Smith TC, Griffiths D, Hindman BJ: Influence of provider type (nurse anesthetist or resident physician), staff assignments, and other covariates on daily evaluations of anesthesiologists' quality of supervision. *Anesth Analg* 2014; 119:670–8
  33. Dexter F, Ledolter J, Hindman BJ: Bernoulli Cumulative Sum (CUSUM) control charts for monitoring of anesthesiologists' performance in supervising anesthesia residents and nurse anesthetists. *Anesth Analg* 2014; 119:679–85
  34. Dexter F, Masursky D, Hindman BJ: Reliability and validity of the anesthesiologist supervision instrument when certified registered nurse anesthetists provide scores. *Anesth Analg* 2015; 120:214–9
  35. Wachtel RE, Dexter F, Epstein RH, Ledolter J: Meta-analysis of desflurane and propofol average times and variability in times to extubation and following commands. *Can J Anaesth* 2011; 58:714–24
  36. Todd MM, Hindman BJ, King BJ: The implementation of quantitative electromyographic neuromuscular monitoring in an academic anesthesia department. *Anesth Analg* 2014; 119:323–31

## ANESTHESIOLOGY REFLECTIONS FROM THE WOOD LIBRARY-MUSEUM

### Dr. M. L. Field's "Nitrous Oxide and Oxygen" Advertising Blotter

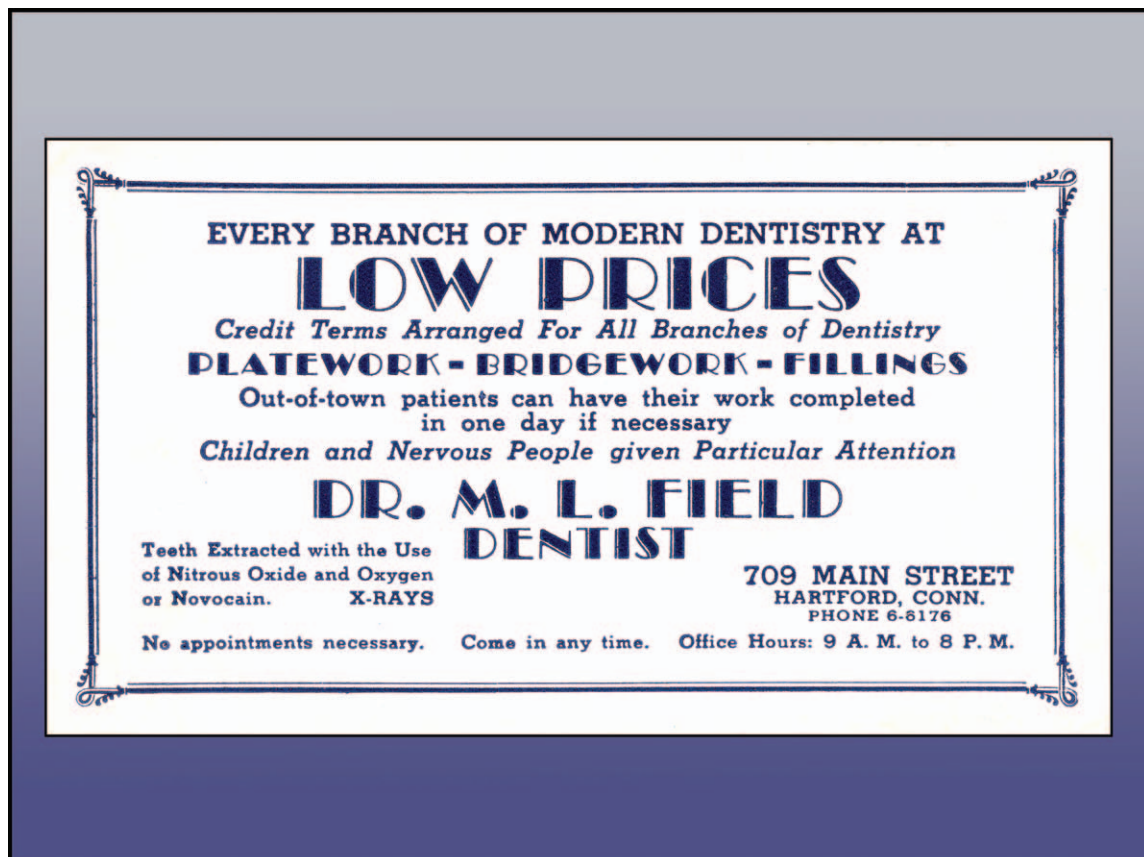

From at least the 1940s through the mid-1960s, Dr. M. L. Field practiced dentistry in Hartford, Connecticut. Centennial celebrations of Dr. Horace Wells' daring 1844 use of nitrous oxide anesthesia likely reminded Dr. Field that his own offices on Grove Street and then on Main Street were merely 3 and 1.5 city blocks, respectively, from the original location of Wells' first dental office. Dr. Field distributed blotters such as this one (above) to local businesses in order to advertise his dental and anesthetic services, which included "Nitrous Oxide and Oxygen or Novocain." This advertising blotter is part of the Wood Library-Museum's Ben Z. Swanson Collection. (Copyright © the American Society of Anesthesiologists, Inc.)

George S. Bause, M.D., M.P.H., Honorary Curator, ASA's Wood Library-Museum of Anesthesiology, Schaumburg, Illinois, and Clinical Associate Professor, Case Western Reserve University, Cleveland, Ohio. UJYC@aol.com.
